# Supplementary material for: Investigation of organophosphorus (OPs) compounds by a needle trap device based on mesoporous organo-layered double hydroxide (organo-LDH)
Source: Royal Society of Chemistry journal article supplement (doi:10.1039/d3ra01732j), 2023-01-01
Supplement: d3ra01732j1.pdf [file d3ra01732j1.pdf]

## **Investigation of Organophosphorus (OPs) Compounds by Needle Trap Device Based on the Mesoporous Organo-Layered Double Hydroxide (Organo-LDH)**

Razzagh Rahimpour<sup>1</sup>, Danial soleymani-ghoozhd<sup>2</sup>, Saber Alizadeh<sup>3</sup>, Ali Firoozichahak<sup>\*4</sup>,  
Faeze Mehregan<sup>5</sup>, Raziieh Firoozi<sup>6</sup>

*<sup>1</sup>Department of Occupational Health Engineering, Research Center for Health Sciences, School of Health, Larestan University of Medical Sciences, Larestan, Iran*

*<sup>2</sup>Student Research Committee, Faculty of Public Health, Kerman University of Medical Sciences, Kerman, Iran*

*<sup>3</sup>Department of Chemistry, Bu-Ali-Sina University, Hamedan, Iran.*

*<sup>4</sup> Department of Occupational Health, Faculty of Health, Social Determinants of Health Research Center, Gonabad University of Medical Science, Gonabad, Iran*

*<sup>5</sup> Medical student, school of medicine, Shahrekord University of Medical Sciences, Shahrekord, Iran.*

*<sup>6</sup>Computer Engineering, Islamic Azad University, Birjand branch. Birjand, Iran.*

*\*Corresponding author:*

*Ali firoozichahak, Faculty Member, Department of Occupational Health, Faculty of Health, Gonabad University of Medical Sciences, Gonabad, Iran.*

*Email: [a.firoozi@edu.umsha.ac.ir](mailto:a.firoozi@edu.umsha.ac.ir)*

**Table S1.** Response Surface Quadratic desorption model of Organophosphate pesticides by Mg-LDH: NTD

| <b>Parameters/analytes</b> | <b>Diazinon</b> | <b>Ethion</b> | <b>Fenitrothion</b> | <b>Malathion</b> | <b>Parathion</b> |
|----------------------------|-----------------|---------------|---------------------|------------------|------------------|
| Optimal Temperature (°C)   | 244.922         | 253.199       | 254.014             | 251.136          | 251.944          |
| Optimal Time (min)         | 5.408           | 5.132         | 4.973               | 5.374            | 5.261            |
| R-Squared                  | 0.9188          | 0.9676        | 0.9615              | 0.9632           | 0.9657           |
| Adj R-Squared              | 0.8609          | 0.9445        | 0.9340              | 0.9369           | 0.9412           |
| SD                         | 350.67          | 308.84        | 306.74              | 230.41           | 379.32           |
| CV                         | 12.58           | 9.08          | 9.14                | 10.15            | 9.13             |
| PRESS                      | 3.946E+06       | 3.008E+06     | 3.590E+06           | 1.959E+06        | 7.070E+06        |
| Lack of Fit                | 0.5400          | 0.3469        | 0.3338              | 0.2291           | 0.1437           |
| p-value                    | 0.0011          | < 0.0001      | < 0.0001            | < 0.0001         | < 0.0001         |

**Table S 2.** Response Surface Quadratic sampling model of Organophosphate pesticides by Mg-LDH: NTD

| <b>Parameters/analytes</b> | <b>Diazinon</b> | <b>Ethion</b> | <b>Fenitrothion</b> | <b>Malathion</b> | <b>Parathion</b> |
|----------------------------|-----------------|---------------|---------------------|------------------|------------------|
| Optimal Temperature (°C)   | 20.000          | 20.580        | 20.000              | 20.152           | 20.185           |
| Optimal Humidity (%)       | 25.000          | 25.291        | 25.000              | 25.852           | 25.812           |
| R-Squared                  | 0.9839          | 0.9746        | 0.9594              | 0.9617           | 0.9612           |
| Adj R-Squared              | 0.9724          | 0.9565        | 0.9305              | 0.9343           | 0.9335           |
| SD                         | 220.07          | 274.97        | 283.58              | 241.19           | 242.69           |
| CV                         | 7.10            | 9.22          | 11.73               | 9.71             | 9.76             |
| PRESS                      | 1.740E+06       | 1.534E+06     | 2.499E+06           | 2.018E+06        | 2.054E+06        |
| Lack of Fit                | 0.3180          | 0.8249        | 0.3307              | 0.3535           | 0.3459           |
| p-value                    | < 0.0001        | < 0.0001      | < 0.0001            | < 0.0001         | < 0.0001         |

**Table S 3:** Comparison of desorption parameters organo-LDH: NTD with other techniques for determination of organophosphorus pesticides

| Technique                                       | Optimal desorption time (min) | Optimal desorption temperature (°C) | Ref           |
|-------------------------------------------------|-------------------------------|-------------------------------------|---------------|
| SPME- sol-gel/nanoclay                          | 4                             | 270                                 | 1             |
| SPME- MIL-53(Al)/Fe <sub>2</sub> O <sub>3</sub> | 2                             | 280                                 | 2             |
| MDSPME- rGOQDs@Fe                               | 3.5                           | NR                                  | 3             |
| SPME -CNTs-SiO <sub>2</sub>                     | 5                             | 260                                 | 4             |
| HS-SPME                                         | 5                             | 250                                 | 5             |
| HS-SPME                                         | 5                             | 260                                 | 6             |
| HS-SPME                                         | NR                            | NR                                  | 7             |
| NTD                                             | 4.9-5.4                       | 244-254                             | Current study |

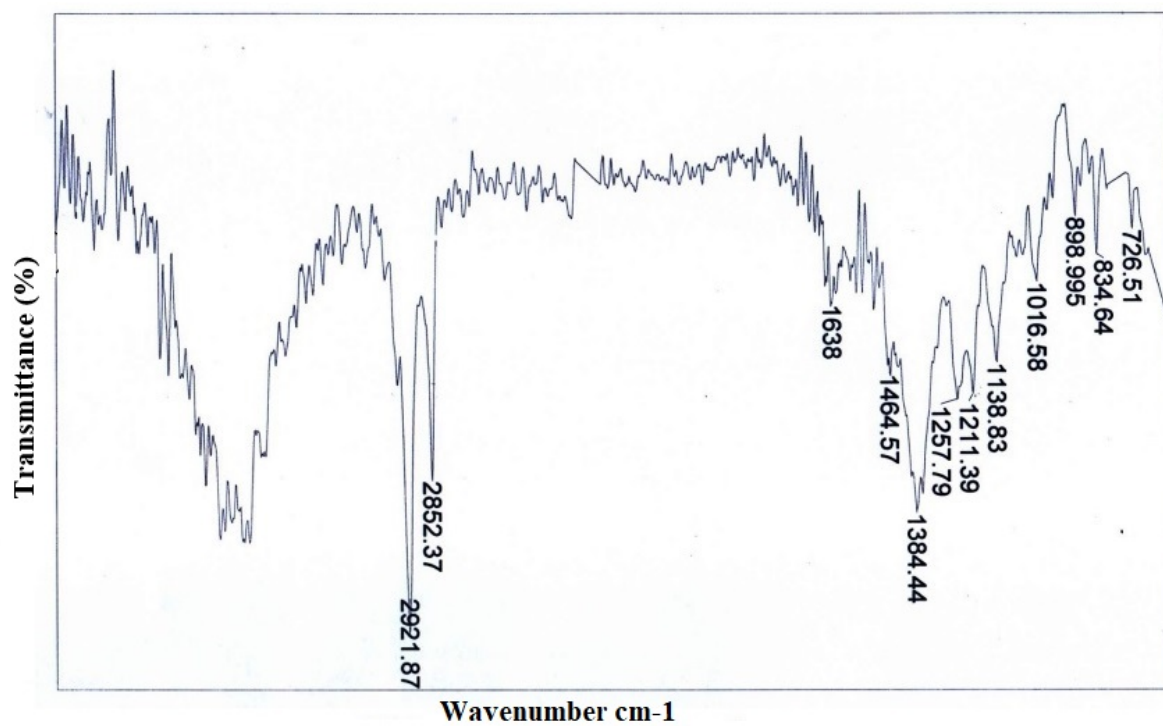

**Fig. S 1:** FT-IR spectroscopy of mesoporous organo-LDH

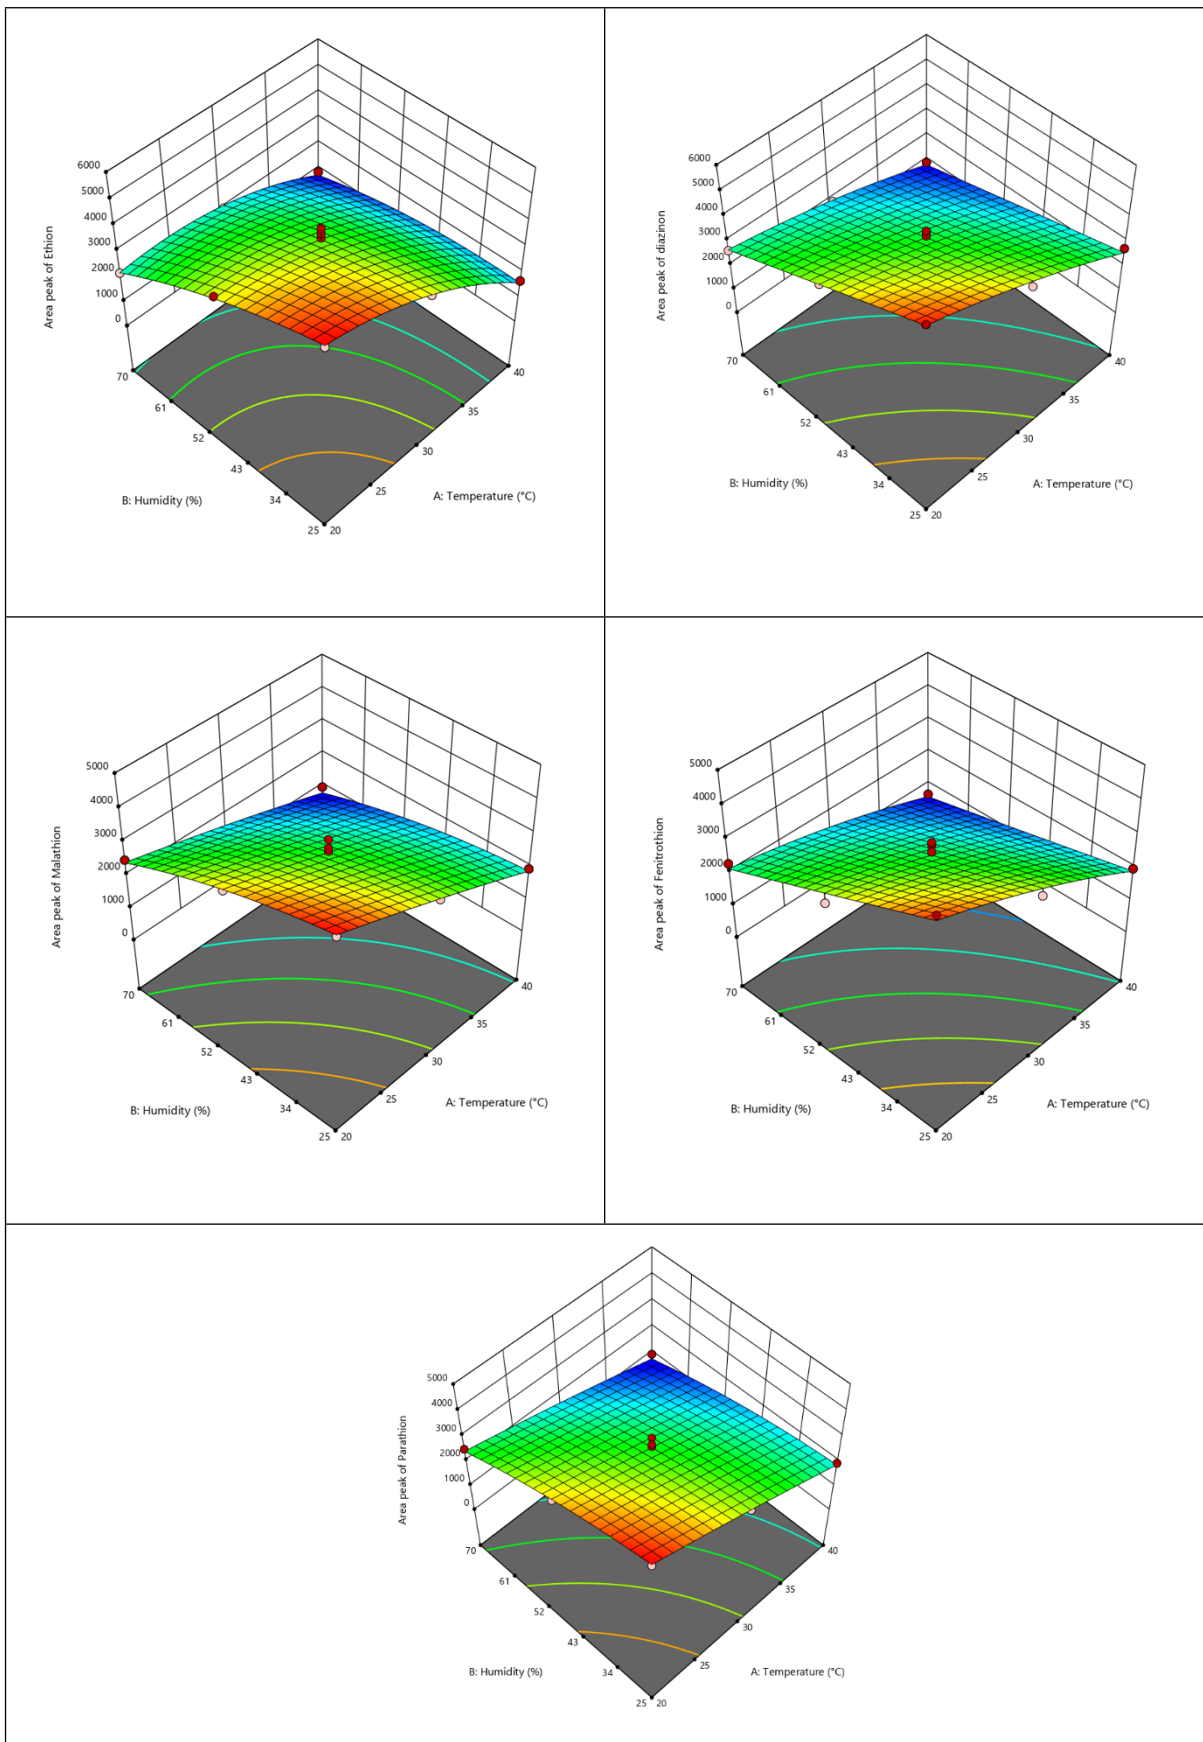

**Fig. S 2:** Optimization of sampling parameters of Organophosphate pesticides compounds sampled with NTD: Mg-LDH

## Reference

- 1 M. Saraji, M. T. Jafari and H. Sherafatmand, *Anal. Bioanal. Chem.*, 2015, **407**, 1241–1252.
- 2 S. Moinfar, A. Khodayari, S. Sohrabnezhad, A. Aghaei and L. A. Jamil, *Microchim. Acta*, 2020, **187**, 647.
- 3 S. Akbarzade, M. Chamsaz, G. H. Rounaghi and M. Ghorbani, *Anal. Bioanal. Chem.*, 2018, **410**, 429–439.
- 4 M. Saraji, M. T. Jafari and M. Mossaddegh, *J. Chromatogr. A*, 2016, **1429**, 30–39.
- 5 F. de M. Rodrigues, P. R. R. Mesquita, L. S. de Oliveira, F. S. de Oliveira, A. Menezes Filho, P. A. de P. Pereira and J. B. de Andrade, *Microchem. J.*, 2011, **98**, 56–61.
- 6 L. B. Abdulra'uf and G. H. Tan, *Food Chem.*, 2013, **141**, 4344–4348.
- 7 D. A. Lambropoulou and T. A. Albanis, *J. Chromatogr. A*, 2001, **922**, 243–255.
